# Supplementary material
Source: MDPI journal article supplement (https://www.mdpi.com/search?q=genes-12-00042)
Supplement: s001 [file genes-12-00042-s001.pdf]

**Supplementary Table 1** Detailed information on polymorphisms of the COVID-19-related genes analyzed in this study.

| Gene           | Gene location | Exon count | Polymorphism | Position                    | Major allele | Minor allele | Classification                     |
|----------------|---------------|------------|--------------|-----------------------------|--------------|--------------|------------------------------------|
| <i>IFITM3</i>  | 11p15.5       | 2          | rs12252      | NC_000011.10:g.320772A>G    | A            | G            | Splice region variant              |
|                |               |            | rs34481144   | NC_000011.10:g.320836C>T    | C            | T            | 5' UTR variant                     |
|                |               |            | rs6598045    | NC_000011.10:g.321001A>G    | A            | G            | 5' UTR variant                     |
| <i>ACE2</i>    | Xp22.2        | 19         | rs2285666    | NC_000023.11:g.15592225C>T  | C            | T            | Splice region variant              |
|                |               |            | rs35803318   | NC_000023.10:g.15582209C>T  | C            | T            | Synonymous variant                 |
|                |               |            | rs2074192    | NC_000023.11:g.15564667C>T  | C            | T            | Intron variant                     |
|                |               |            | rs2106809    | NC_000023.11:g.15599938A>G  | A            | G            | Intron variant                     |
| <i>TMPRSS2</i> | 21q22.3       | 15         | rs2070788,   | NC_000021.9:g.41470061G>A   | A            | G            | Intron variant                     |
|                |               |            | rs2298659    | NC_000021.9:g.41473447G>A   | G            | A            | Synonymous variant                 |
|                |               |            | rs17854725   | NC_000021.9:g.41473456A>G   | G            | A            | Synonymous variant                 |
|                |               |            | rs12329760   | NC_000021.9:g.41480570C>T   | C            | T            | Missense variant                   |
|                |               |            | rs3787950    | NC_000021.9:g.41494369T>C   | T            | C            | Synonymous variant                 |
|                |               |            | rs463727     | NC_000021.9:g.41464259T>A   | T            | A            | 3' UTR variant                     |
|                |               |            | rs9974589    | NC_000021.9:g.41470196A>C   | A            | C            | Intron variant                     |
|                |               |            | rs34624090   | NC_000021.9:g.41471517dup   | CCC          | CCCC         | Intron variant                     |
|                |               |            | rs7364083    | NC_000021.9:g.41472130G>A   | G            | A            | Intron variant                     |
|                |               |            | rs55964536   | NC_000021.9:g.41473711C>T   | C            | T            | Intron variant                     |
|                |               |            | rs734056     | NC_000021.9:g.41480393C>A   | C            | A            | Intron variant                     |
|                |               |            | rs4290734    | NC_000021.9:g.41481156A>G   | A            | G            | Intron variant                     |
|                |               |            | rs34783969   | NC_000021.9:g.41482711A>T   | A            | T            | Intron variant                     |
|                |               |            | rs11702475   | NC_000021.9:g.41485641C>T   | C            | T            | Intron variant                     |
|                |               |            | rs35899679   | NC_000021.9:g.41491393C>A   | C            | A            | Intron variant                     |
|                |               |            | rs35041537   | NC_000021.9:g.41491442C>T   | C            | T            | Intron variant                     |
| <i>IL6</i>     | 7p15.3        | 6          | rs1800795    | NC_000007.14:g.22727026C>G  | C            | G            | Intron variant                     |
| <i>LZTFL1</i>  | 3p21.31       | 15         | rs11385942   | NC_000003.12:g.45834969dup, | AA           | AAA          | Non coding transcript exon variant |
| <i>ABO</i>     | 9q34.2,       | 7          | rs657152     | NC_000009.12:g.133263862A>C | C            | A            | Intron variant                     |

**Supplementary Table 2** Summary of correlation analysis between the case fatality rate of COVID-19 and allele frequencies of the polymorphisms of the *IFITM3*, *ACE2*, *TMPRSS2* and *IL6* genes in several ethnic groups.

| Gene             | Polymorphisms | Matching groups in1000 genome project | Allele frequencies |       | Case fatality rate (%) | r <sup>2</sup> | P-value |
|------------------|---------------|---------------------------------------|--------------------|-------|------------------------|----------------|---------|
| <i>IFITM3</i>    | rs12252       |                                       | A                  | G     |                        | 0.1725         | 0.0419  |
|                  |               | African (AFR)                         | 0.740              | 0.260 | 2.07                   |                |         |
|                  |               | European (EUR)                        | 0.959              | 0.041 | 7.40                   |                |         |
|                  |               | American (AMR)                        | 0.823              | 0.177 | 4.90                   |                |         |
|                  |               | East Asian (EAS)                      | 0.472              | 0.528 | 5.40                   |                |         |
|                  |               | South Asian (SAS)                     | 0.853              | 0.147 | 1.73                   |                |         |
|                  | rs34481144    |                                       | C                  | T     |                        | 0.017          | 0.8055  |
|                  |               | African (AFR)                         | 0.957              | 0.043 | 2.07                   |                |         |
|                  |               | European (EUR)                        | 0.538              | 0.462 | 7.40                   |                |         |
|                  |               | American (AMR)                        | 0.767              | 0.233 | 4.90                   |                |         |
|                  |               | East Asian (EAS)                      | 0.994              | 0.006 | 5.40                   |                |         |
|                  | rs6598045     |                                       | A                  | G     |                        | 0.8901         | 0.0047  |
|                  |               | African (AFR)                         | 0.701              | 0.299 | 2.07                   |                |         |
|                  |               | European (EUR)                        | 0.894              | 0.106 | 7.40                   |                |         |
|                  |               | American (AMR)                        | 0.778              | 0.222 | 4.90                   |                |         |
| East Asian (EAS) |               | 0.859                                 | 0.141              | 5.40  |                        |                |         |
| <i>ACE2</i>      | rs2285666     |                                       | C                  | T     |                        | 0.0139         | 0.8243  |
|                  |               | African (AFR)                         | 0.789              | 0.211 | 2.07                   |                |         |
|                  |               | European (EUR)                        | 0.765              | 0.235 | 7.40                   |                |         |
|                  |               | American (AMR)                        | 0.664              | 0.336 | 4.90                   |                |         |
|                  |               | East Asian (EAS)                      | 0.463              | 0.537 | 5.40                   |                |         |
|                  | rs35803318    |                                       | C                  | T     |                        | 0.3933         | 0.1826  |
|                  |               | African (AFR)                         | 0.999              | 0.001 | 2.07                   |                |         |
|                  |               | European (EUR)                        | 0.946              | 0.054 | 7.40                   |                |         |
|                  |               | American (AMR)                        | 0.929              | 0.071 | 4.90                   |                |         |
|                  |               | East Asian (EAS)                      | 1.000              | 0.000 | 5.40                   |                |         |
|                  |               | South Asian (SAS)                     | 1.000              | 0.000 | 1.73                   |                |         |

|                |            |                   |       |       |        |        |
|----------------|------------|-------------------|-------|-------|--------|--------|
|                | rs2074192  | C                 | T     |       | 0.6503 | 0.0526 |
|                |            | African (AFR)     | 0.654 | 0.346 | 2.07   |        |
|                |            | European (EUR)    | 0.574 | 0.426 | 7.40   |        |
|                |            | American (AMR)    | 0.601 | 0.399 | 4.90   |        |
|                |            | East Asian (EAS)  | 0.572 | 0.428 | 5.40   |        |
|                |            | South Asian (SAS) | 0.774 | 0.226 | 1.73   |        |
|                | rs2106809  | A                 | G     |       | 0.0511 | 0.6666 |
|                |            | African (AFR)     | 0.911 | 0.089 | 2.07   |        |
|                |            | European (EUR)    | 0.753 | 0.247 | 7.40   |        |
|                |            | American (AMR)    | 0.676 | 0.324 | 4.90   |        |
|                |            | East Asian (EAS)  | 0.478 | 0.522 | 5.40   |        |
|                |            | South Asian (SAS) | 0.517 | 0.483 | 1.73   |        |
| <i>TMPRSS2</i> | rs2070788  | G                 | A     |       | 0.1475 | 0.4522 |
|                |            | African (AFR)     | 0.274 | 0.726 | 2.07   |        |
|                |            | European (EUR)    | 0.464 | 0.534 | 7.40   |        |
|                |            | American (AMR)    | 0.494 | 0.506 | 4.90   |        |
|                |            | East Asian (EAS)  | 0.356 | 0.644 | 5.40   |        |
|                |            | South Asian (SAS) | 0.466 | 0.534 | 1.73   |        |
|                | rs2298659  | G                 | A     |       | 0.7236 | 0.0318 |
|                |            | African (AFR)     | 0.825 | 0.175 | 2.07   |        |
|                |            | European (EUR)    | 0.770 | 0.230 | 7.40   |        |
|                |            | American (AMR)    | 0.782 | 0.218 | 4.90   |        |
|                |            | East Asian (EAS)  | 0.751 | 0.249 | 5.40   |        |
|                |            | South Asian (SAS) | 0.811 | 0.189 | 1.73   |        |
|                | rs17854725 | A                 | G     |       | 0.0021 | 0.9316 |
|                |            | African (AFR)     | 0.661 | 0.339 | 2.07   |        |
|                |            | European (EUR)    | 0.458 | 0.542 | 7.40   |        |
|                |            | American (AMR)    | 0.589 | 0.411 | 4.90   |        |
|                |            | East Asian (EAS)  | 0.879 | 0.121 | 5.40   |        |
|                |            | South Asian (SAS) | 0.556 | 0.444 | 1.73   |        |
|                | rs12329760 | C                 | T     |       | 0.0013 | 0.9451 |
|                |            | African (AFR)     | 0.713 | 0.287 | 2.07   |        |

|            |                   |       |       |      |        |        |
|------------|-------------------|-------|-------|------|--------|--------|
|            | European (EUR)    | 0.764 | 0.236 | 7.40 |        |        |
|            | American (AMR)    | 0.846 | 0.154 | 4.90 |        |        |
|            | East Asian (EAS)  | 0.638 | 0.362 | 5.40 |        |        |
|            | South Asian (SAS) | 0.774 | 0.226 | 1.73 |        |        |
| rs3787950  |                   | T     | C     |      | 0.6165 | 0.0643 |
|            | African (AFR)     | 0.782 | 0.218 | 2.07 |        |        |
|            | European (EUR)    | 0.921 | 0.079 | 7.40 |        |        |
|            | American (AMR)    | 0.939 | 0.061 | 4.90 |        |        |
|            | East Asian (EAS)  | 0.845 | 0.155 | 5.40 |        |        |
|            | South Asian (SAS) | 0.743 | 0.257 | 1.73 |        |        |
| rs463727   |                   | T     | A     |      | 0.0009 | 0.9547 |
|            | African (AFR)     | 0.921 | 0.079 | 2.07 |        |        |
|            | European (EUR)    | 0.543 | 0.457 | 7.40 |        |        |
|            | American (AMR)    | 0.728 | 0.272 | 4.90 |        |        |
|            | East Asian (EAS)  | 0.994 | 0.006 | 5.40 |        |        |
|            | South Asian (SAS) | 0.645 | 0.355 | 1.73 |        |        |
| rs9974589  |                   | A     | C     |      | 0.1217 | 0.3489 |
|            | African (AFR)     | 0.273 | 0.727 | 2.07 |        |        |
|            | European (EUR)    | 0.464 | 0.536 | 7.40 |        |        |
|            | American (AMR)    | 0.493 | 0.507 | 4.90 |        |        |
|            | East Asian (EAS)  | 0.356 | 0.644 | 5.40 |        |        |
|            | South Asian (SAS) | 0.465 | 0.535 | 1.73 |        |        |
| rs34624090 |                   | CCC   | CCCC  |      | 0.0063 | 0.8809 |
|            | African (AFR)     | 0.904 | 0.096 | 2.07 |        |        |
|            | European (EUR)    | 0.558 | 0.442 | 7.40 |        |        |
|            | American (AMR)    | 0.759 | 0.241 | 4.90 |        |        |
|            | East Asian (EAS)  | 0.994 | 0.006 | 5.40 |        |        |
|            | South Asian (SAS) | 0.613 | 0.387 | 1.73 |        |        |
| rs7364083  |                   | G     | A     |      | 0.2269 | 0.3396 |
|            | African (AFR)     | 0.151 | 0.849 | 2.07 |        |        |
|            | European (EUR)    | 0.462 | 0.538 | 7.40 |        |        |
|            | American (AMR)    | 0.480 | 0.520 | 4.90 |        |        |
|            | East Asian (EAS)  | 0.355 | 0.645 | 5.40 |        |        |

|            |                   |       |       |      |        |        |
|------------|-------------------|-------|-------|------|--------|--------|
|            | South Asian (SAS) | 0.462 | 0.538 | 1.73 |        |        |
| rs55964536 | C                 | T     |       |      | 0.0044 | 0.9004 |
|            | African (AFR)     | 0.899 | 0.101 | 2.07 |        |        |
|            | European (EUR)    | 0.517 | 0.483 | 7.40 |        |        |
|            | American (AMR)    | 0.712 | 0.288 | 4.90 |        |        |
|            | East Asian (EAS)  | 0.994 | 0.006 | 5.40 |        |        |
|            | South Asian (SAS) | 0.602 | 0.398 | 1.73 |        |        |
| rs734056   | C                 | A     |       |      | 0.0257 | 0.7615 |
|            | African (AFR)     | 0.787 | 0.213 | 2.07 |        |        |
|            | European (EUR)    | 0.511 | 0.489 | 7.40 |        |        |
|            | American (AMR)    | 0.683 | 0.317 | 4.90 |        |        |
|            | East Asian (EAS)  | 0.992 | 0.008 | 5.40 |        |        |
|            | South Asian (SAS) | 0.566 | 0.434 | 1.73 |        |        |
| rs4290734  | A                 | G     |       |      | 0.0002 | 0.9769 |
|            | African (AFR)     | 0.931 | 0.069 | 2.07 |        |        |
|            | European (EUR)    | 0.513 | 0.487 | 7.40 |        |        |
|            | American (AMR)    | 0.689 | 0.311 | 4.90 |        |        |
|            | East Asian (EAS)  | 0.993 | 0.007 | 5.40 |        |        |
|            | South Asian (SAS) | 0.569 | 0.431 | 1.73 |        |        |
| rs34783969 | A                 | T     |       |      | 0.0066 | 0.8786 |
|            | African (AFR)     | 0.885 | 0.115 | 2.07 |        |        |
|            | European (EUR)    | 0.512 | 0.488 | 7.40 |        |        |
|            | American (AMR)    | 0.683 | 0.317 | 4.90 |        |        |
|            | East Asian (EAS)  | 0.993 | 0.007 | 5.40 |        |        |
|            | South Asian (SAS) | 0.572 | 0.428 | 1.73 |        |        |
| rs11702475 | C                 | T     |       |      | 0.007  | 0.8752 |
|            | African (AFR)     | 0.877 | 0.123 | 2.07 |        |        |
|            | European (EUR)    | 0.509 | 0.491 | 7.40 |        |        |
|            | American (AMR)    | 0.690 | 0.310 | 4.90 |        |        |
|            | East Asian (EAS)  | 0.992 | 0.008 | 5.40 |        |        |
|            | South Asian (SAS) | 0.573 | 0.427 | 1.73 |        |        |
| rs35899679 | C                 | A     |       |      | 0.0048 | 0.8959 |

|               |            |                   |       |       |      |        |        |
|---------------|------------|-------------------|-------|-------|------|--------|--------|
|               |            | African (AFR)     | 0.893 | 0.107 | 2.07 |        |        |
|               |            | European (EUR)    | 0.537 | 0.463 | 7.40 |        |        |
|               |            | American (AMR)    | 0.712 | 0.288 | 4.90 |        |        |
|               |            | East Asian (EAS)  | 0.993 | 0.007 | 5.40 |        |        |
|               |            | South Asian (SAS) | 0.616 | 0.384 | 1.73 |        |        |
|               | rs35041537 |                   | C     | T     |      | 0.0061 | 0.8831 |
|               |            | African (AFR)     | 0.886 | 0.114 | 2.07 |        |        |
|               |            | European (EUR)    | 0.537 | 0.463 | 7.40 |        |        |
|               |            | American (AMR)    | 0.709 | 0.291 | 4.90 |        |        |
|               |            | East Asian (EAS)  | 0.993 | 0.007 | 5.40 |        |        |
|               |            | South Asian (SAS) | 0.615 | 0.385 | 1.73 |        |        |
| <i>IL6</i>    | rs1800795  |                   | C     | G     |      | 0.0136 | 0.8260 |
|               |            | African (AFR)     | 0.018 | 0.982 | 2.07 |        |        |
|               |            | European (EUR)    | 0.416 | 0.584 | 7.40 |        |        |
|               |            | American (AMR)    | 0.184 | 0.816 | 4.90 |        |        |
|               |            | East Asian (EAS)  | 0.001 | 0.999 | 5.40 |        |        |
|               |            | South Asian (SAS) | 0.139 | 0.861 | 1.73 |        |        |
| <i>LZTFL1</i> | rs11385942 |                   | AA    | AAA   |      | 0.1691 | 0.4180 |
|               |            | African (AFR)     | 0.947 | 0.053 | 2.07 |        |        |
|               |            | European (EUR)    | 0.919 | 0.081 | 7.40 |        |        |
|               |            | American (AMR)    | 0.954 | 0.046 | 4.90 |        |        |
|               |            | East Asian (EAS)  | 0.995 | 0.005 | 5.40 |        |        |
|               |            | South Asian (SAS) | 0.704 | 0.296 | 1.73 |        |        |
| <i>ABO</i>    | rs657152   |                   | A     | C     |      | 0.1016 | 0.5380 |
|               |            | African (AFR)     | 0.461 | 0.539 | 2.07 |        |        |
|               |            | European (EUR)    | 0.400 | 0.600 | 7.40 |        |        |
|               |            | American (AMR)    | 0.251 | 0.749 | 4.90 |        |        |
|               |            | East Asian (EAS)  | 0.372 | 0.628 | 5.40 |        |        |
|               |            | South Asian (SAS) | 0.404 | 0.596 | 1.73 |        |        |
